# Supplementary material
Source: Springer Nature journal article supplement (https://www.springermedizin.de/resource/supplementary/12884_2012_764_MOESM1_ESM.pdf/9458150)
Supplement: MOESM1 [file 9458150]

# STRUGGLING WITH DAILY LIFE AND ENDURING PAIN

| <b>Actions as a result of PGP</b> | 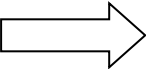 | <b>Consequences on daily living as a result of PGP</b> |  | <b>Consequences on pregnancy and future as a result of PGP</b> |
|-----------------------------------|-----------------------------------------------------------------------------------|--------------------------------------------------------|-------------------------------------------------------------------------------------|----------------------------------------------------------------|
| Grasping the incomprehensible     |  | Enduring the pain                                      |  | Paying the price and reconsidering the future                  |
| Balancing support and dependence  |                                                                                   | Being a burden                                         |                                                                                     |                                                                |
| Managing the losses               |                                                                                   | Calculating the risks<br>Abdicating as a mother        |                                                                                     |                                                                |
